# Supplementary material
Source: Springer Nature journal article supplement (https://www.springermedizin.de/resource/supplementary/12967_2014_1787_MOESM4_ESM.pdf/9575300)

**A**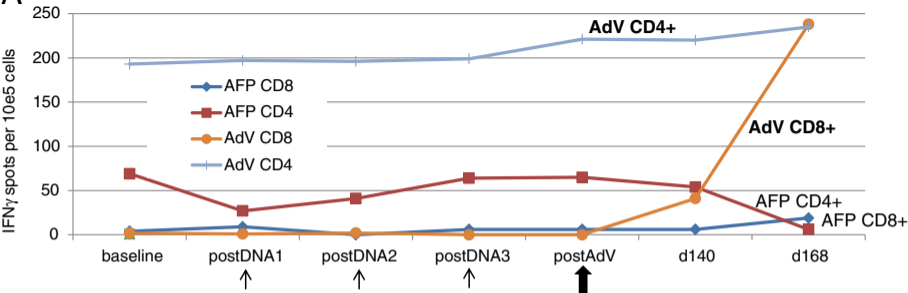**B**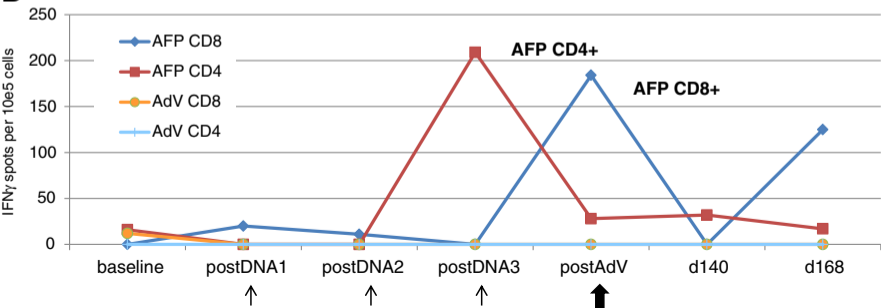

Supplement: MOESM4 [file 9575300]
